# Supplementary material for: Suboptimal primary and secondary cardiovascular disease prevention in HIV-positive individuals on antiretroviral therapy
Source: PubMed Central journal article supplement — Eur J Prev Cardiol. 2017 Jun 5;24(12):1297–307. doi: 10.1177/2047487317714350 (PMC5548068; doi:10.1177/2047487317714350), 2017-06-05
Supplement: CPR714350_supp_Mat.pdf [file CPR714350_supp_Mat.pdf]

## **Appendix: AGE<sub>h</sub>IV Cohort Study Group**

**Scientific oversight and coordination:** P. Reiss (principal investigator), F.W.N.M. Wit, M. van der Valk, J. Schouten, K.W. Kooij, R.A. van Zoest, E. Verheij, S.O. Verboeket, B.C. Elsenga (Academic Medical Center (AMC), Department of Global Health and Amsterdam Institute for Global Health and Development (AIGHD)).

M. Prins (co-principal investigator), M.F. Schim van der Loeff, M. Dijkstra, L. del Grande, T. Kruijer, V. Olthof, G.R. Visser, L. May (Public Health Service of Amsterdam, Department of Infectious Diseases).

**Datamanagement:** S. Zaheri, M.M.J. Hillebregt, Y.M.C. Ruijs, D.P. Benschop, A. el Berkaoui (HIV Monitoring Foundation).

**Central laboratory support:** N.A. Kootstra, A.M. Harskamp-Holwerda, I. Maurer, M.M. Mangas Ruiz, A.F. Girigorie, B. Boeser-Nunnink (AMC, Laboratory for Viral Immune Pathogenesis and Department of Experimental Immunology).

**Project management and administrative support:** W. Zikkenheiner, F.R. Janssen (AIGHD).

**Participating HIV physicians and nurses:** S.E. Geerlings, M.H. Godfried, A. Goorhuis, J.W.R. Hovius, J.T.M. van der Meer, F.J.B. Nellen, T. van der Poll, J.M. Prins, P. Reiss, M. van der Valk, W.J. Wiersinga, M. van Vugt, G. de Bree, F.W.N.M. Wit; J. van Eden, A.M.H. van Hes, M. Mutschelknauss, H.E. Nobel, F.J.J. Pijnappel, M. Bijsterveld, A. Weijsenfeld, S. Smalhout (AMC, Division of Infectious Diseases).

**Other collaborators:** P.G. Postema (AMC, Department of Cardiology); P.H.L.T. Bisschop, M.J.M. Serlie (AMC, Division of Endocrinology and Metabolism); P. Lips (Free University Medical Center Amsterdam); E. Dekker (AMC, Department of Gastroenterology); N. van der Velde (AMC, Division of Geriatric Medicine); J.M.R. Willemsen, L. Vogt (AMC, Division of Nephrology); J. Schouten, P. Portegies, B.A. Schmand, G.J. Geurtsen (AMC, Department of Neurology); F.D. Verbraak, N. Demirkaya (AMC, Department of Ophthalmology); I. Visser (AMC, Department of Psychiatry); A. Schadé (Free University

Medical Center Amsterdam, Department of Psychiatry); P.T. Nieuwkerk, N. Langebeek (AMC, Department of Medical Psychology); R.P. van Steenwijk, E. Dijkers (AMC, Department of Pulmonary medicine); C.B.L.M. Majoie, M.W.A. Caan, T. Su (AMC, Department of Radiology); H.W. van Lunsen, M.A.F. Nievaard (AMC, Department of Gynaecology); B.J.H. van den Born, E.S.G. Stroes, (AMC, Division of Vascular Medicine); W.M.C. Mulder (HIV Vereniging Nederland).

**Supplementary Table. Indications for treatment with cardiovascular medication according to Dutch CVRM guidelines**

| <b>Treatment recommendations according to the Dutch CVRM guidelines</b>                              |                                                                                                                                                                                                                                                                                                  |
|------------------------------------------------------------------------------------------------------|--------------------------------------------------------------------------------------------------------------------------------------------------------------------------------------------------------------------------------------------------------------------------------------------------|
| <b>Primary prevention<sup>a</sup></b>                                                                |                                                                                                                                                                                                                                                                                                  |
| Low 10-year cardiovascular risk (<10%), <i>or</i>                                                    | Lifestyle interventions                                                                                                                                                                                                                                                                          |
| Moderate 10-year cardiovascular risk (10-20%), no additional risk factors <sup>b</sup>               | TC/HDL-ratio >8: initiate lipid-lowering medication<br>SBP >180 mmHg: initiate antihypertensive medication                                                                                                                                                                                       |
| Moderate 10-year cardiovascular risk (10-20%), with additional risk factors <sup>b</sup> , <i>or</i> | Lifestyle interventions                                                                                                                                                                                                                                                                          |
| High 10-year cardiovascular risk (≥20%)                                                              | TC/HDL-ratio >8 and/or LDL-c >2.5 mmol/L: initiate lipid-lowering medication<br>SBP >140 mmHg or >160 mmHg (in people aged ≥80 years): initiate antihypertensive medication                                                                                                                      |
| <b>Secondary prevention</b>                                                                          |                                                                                                                                                                                                                                                                                                  |
| Coronary heart disease (myocardial infarction, angina)                                               | Lifestyle interventions<br>Lipid-lowering medication (all individuals, regardless of cholesterol level)<br>Beta blocker (all individuals, regardless of SBP)<br>SBP >140 mmHg: initiate additional antihypertensive medication<br>Antiplatelet drug or equivalent <sup>c</sup> (all individuals) |
| Stroke/TIA, <i>or</i>                                                                                | Lifestyle interventions                                                                                                                                                                                                                                                                          |
| Peripheral artery disease                                                                            | TC/HDL-ratio >8 and/or LDL-c >2.5 mmol/L: initiate lipid-                                                                                                                                                                                                                                        |

lowering medication

SBP >140 mmHg: initiate antihypertensive medication

Antiplatelet drug or equivalent<sup>c</sup> (all individuals)

<sup>a</sup> Predicted 10-year risk of cardiovascular mortality and morbidity was calculated using the Systemic COronary Risk Evaluation (SCORE) risk equation adjusted for national data. Age-specific conversion factors for the Dutch population were used to translate the cardiovascular mortality risk to a cardiovascular mortality and morbidity risk, i.e. 35-45 years: 5, 45-65 years: 4, and ≥65 years: 3.

<sup>b</sup> Additional risk factors include a positive family history of CVD (defined as myocardial infarction in a first-degree relative <60 years), BMI >35 kg/m<sup>2</sup>, eGFR <30 mL/min/1.73 m<sup>2</sup>, or at least two of the following risk factors: physical inactivity, BMI 30-35 kg/m<sup>2</sup>, eGFR 30-60 mL/min/1.73 m<sup>2</sup> among those below 65 years of age, or eGFR 30-45 mL/min/1.73 m<sup>2</sup> among those aged 65 years or above. Diabetes mellitus patients with poor glycemic control (i.e. HbA1c >53 mmol/mol), and microalbuminuria (i.e. albumin-creatinine ratio >3mg/mmol) are also assigned as additional risk factors.

<sup>c</sup> Individuals with prior CVD should use antiplatelet medication, unless they have an indication for oral anticoagulant medication (e.g. atrial fibrillation, stenting, heart valve replacement).

*Abbreviations:* BMI, body mass index; CVD, cardiovascular disease; eGFR, estimated glomerular filtration rate; CVRM, cardiovascular risk management; LDL-c, LDL-cholesterol; SBP, systolic blood pressure; TC/HDL-ratio, total cholesterol to HDL cholesterol ratio; TIA, transient ischemic attack.
